# Supplementary material
Source: Research Square preprint supplement (doi:10.21203/rs.3.rs-9188214/v1)
Supplement: Supplementary file 1 [file 15508fac7f1f6f80257d1959.docx]

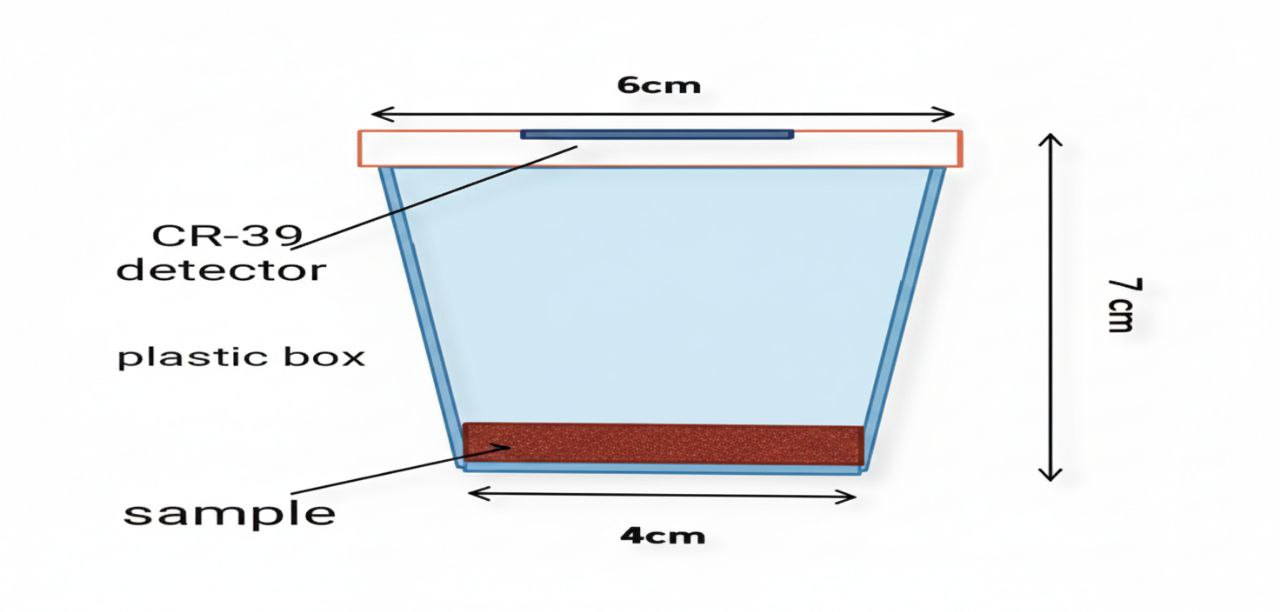


**Figure .** Special cups for measuring radon gas concentration in fertilizer and pesticide samples.

**Table 1.** Radon concentrations (Bq.m⁻³) in chemical fertilizer samples.

| CSRn  (Bq.m⁻³) | CRn (Bq.m⁻³) | Rn  (Track/mm2) | Origin | Fertilizer name | Sample Cod | Site. No |
| --- | --- | --- | --- | --- | --- | --- |
| 3957.47 | 34.62 | 198816.568 | Italy | Gardenia | F1 |  |
| 2308.49 | 20.20 | 115976.331 | Belgium | Dab | F2 |  |
| 3038.75 | 26.59 | 152662.721 | Jordan | Smart Fert | F3 |  |
| 6195.45 | 54.21 | 311242.603 | Jordan | Smart Fert | F4 |  |
| 6902.17 | 60.39 | 346745.562 | UAE | Nitropist | F5 |  |
| 4475.74 | 39.16 | 224852.071 | Saudi Arabia | LIBRO | F6 |  |
| 1036.42 | 9.06 | 52071.005 | Netherlands | Ultrasol | F7 |  |
| 3439.20 | 30.09 | 172781.065 | Jordan | Smart Fert | F8 |  |
| 471.07 | 4.12 | 23668.639 | Saudi Arabia | Libro | F9 |  |
| 5088.29 | 44.52 | 255621.301 | Saudi Arabia | Libro | F10 |  |
| 4028.21 | 35.24 | 202366.863 | Netherlands | Ferticrop | F11 |  |
| 2496.94 | 21.84 | 125443.786 | Serbia | Ultrasol | F12 |  |
| 3038.75 | 26.59 | 152662.721 | Turkey | Dab | F13 |  |
| 5276.74 | 46.17 | 265088.757 | Jordan | Dab | F14 |  |
| 3957.47 | 34.62 | 198816.568 | Spain | Single Super  PHOSPHATE | F15 |  |
| 12414.68 | 108.63 | 623668.639 | Jordan | Smart Fert | F16 |  |
|  | 30.46 | Average | | | | |

**Figure 2.** Radon concentration (Bq.m⁻³) in chemical fertilizer samples.

**Table 2.** Radon concentrations (Bq.m⁻³) in insecticide samples.

| CSRn  (Bq.m⁻³) | CRn (Bq.m⁻³) | Rn  (Track/mm2) | Origin | Pesticide name | Sample Cod | Sit. No |
| --- | --- | --- | --- | --- | --- | --- |
| 1837.42 | 16.07 | 92307.692 | China | Baron | P1 |  | |
| 1908.05 | 16.69 | 95857.988 | Lebanon | Cita | P2 |  | |
| 1436.86 | 12.57 | 72189.349 | India | Spear | P3 |  | |
| 2638.31 | 23.08 | 132544.378 | India | Sword | P4 |  | |
| 4876.18 | 42.66 | 244970.414 | Jordan | Cezar | P5 |  | |
| 1154.24 | 10.10 | 57988.165 | China | Getara | P6 |  | |
| 9399.12 | 82.24 | 472189.349 | China | Efecekt | P7 |  | |
| 5394.45 | 47.20 | 271005.917 | Lebanon | Aviator | P8 |  | |
| 1319.15 | 11.54 | 66272.189 | Iraq | Qethara | P9 |  | |
| 3839.76 | 33.59 | 192899.408 | China | Atlas | P10 |  | |
| 1059.96 | 9.27 | 53254.437 | India | Venus | P11 |  | |
| 4546.48 | 39.78 | 228402.366 | China | Clipper | P12 |  | |
| 1130.70 | 9.89 | 56804.733 | India | Mars | P13 |  | |
|  | 27.28 | Average | | | | |

**Figure 3.** Radon concentration (Bq.m⁻³) in insecticide samples.

Table 3. The potential alpha energy(mWL) in chemical fertilizer samples.

| PAEC (mWL) | Rn  (Track/mm2) | | Origin | Fertilizer name | | Sample Cod | Site. No |
| --- | --- | --- | --- | --- | --- | --- | --- |
| 7.48 | 198816.568 | | Italy | Gardenia | | F1 |  |
| 4.36 | 115976.331 | | Belgium | Dab | | F2 |  |
| 5.74 | 152662.721 | | Jordan | Smart Fert | | F3 |  |
| 11.72 | 311242.603 | | Jordan | Smart Fert | | F4 |  |
| 13.05 | 346745.562 | | UAE | Nitropist | | F5 |  |
| 8.46 | 224852.071 | | Saudi Arabia | LIBRO | | F6 |  |
| 1.96 | 52071.005 | | Netherlands | Ultrasol | | F7 |  |
| 6.50 | 172781.065 | | Jordan | Smart Fert | | F8 |  |
| 0.89 | 23668.639 | | Saudi Arabia | Libro | | F9 |  |
| 9.62 | 255621.301 | | Saudi Arabia | Libro | | F10 |  |
| 7.62 | 202366.863 | | Netherlands | Ferticrop | | F11 |  |
| 4.72 | 125443.786 | | Serbia | Ultrasol | | F12 |  |
| 5.74 | 152662.721 | | Turkey | Dab | | F13 |  |
| 9.98 | 265088.757 | | Jordan | Dab | | F14 |  |
| 7.48 | 198816.568 | | Spain | Single Super  PHOSPHATE | | F15 |  |
| 23.48 | 623668.639 | | Jordan | Smart Fert | | F16 |  |
| 8.05 | 213905.325 | Average | | |  | | |

Figure 4. The potential alpha energy(mWL) in chemical fertilizer samples.

Table 4. Potential alpha energy (mWL) in pesticide samples.

| PAEC (mWL) | Rn  (Track/mm2) | Origin | | | Pesticide name | Sample Cod | Sit. No |
| --- | --- | --- | --- | --- | --- | --- | --- |
| 3.47 | 92307.692 | China | | | Baron | P1 |  | |
| 3.60 | 95857.988 | Lebanon | | | Cita | P2 |  | |
| 2.71 | 72189.349 | India | | | Spear | P3 |  | |
| 4.99 | 132544.378 | India | | | Sword | P4 |  | |
| 9.22 | 244970.414 | Jordan | | | Cezar | P5 |  | |
| 2.18 | 57988.165 | China | | | Getara | P6 |  | |
| 17.78 | 472189.349 | China | | | Efecekt | P7 |  | |
| 10.20 | 271005.917 | Lebanon | | | Aviator | P8 |  | |
| 2.49 | 66272.189 | Iraq | | | Qethara | P9 |  | |
| 7.26 | 192899.408 | China | | | Atlas | P10 |  | |
| 2.05 | 53254.437 | India | | | Venus | P11 |  | |
| 8.60 | 228402.366 | China | | | Clipper | P12 |  | |
| 2.13 | 56804.733 | India | | | Mars | P13 |  | |
| 5.89 | 156668.183 | |  | Average | | | |

**Figure 5.** Potential alpha energy (mWL) in pesticide samples.
